# Supplementary material for: Molecular insights into programmed cell death in esophageal squamous cell carcinoma
Source: PeerJ journal article supplement (doi:10.7717/peerj.17690), 2024-07-10

**A**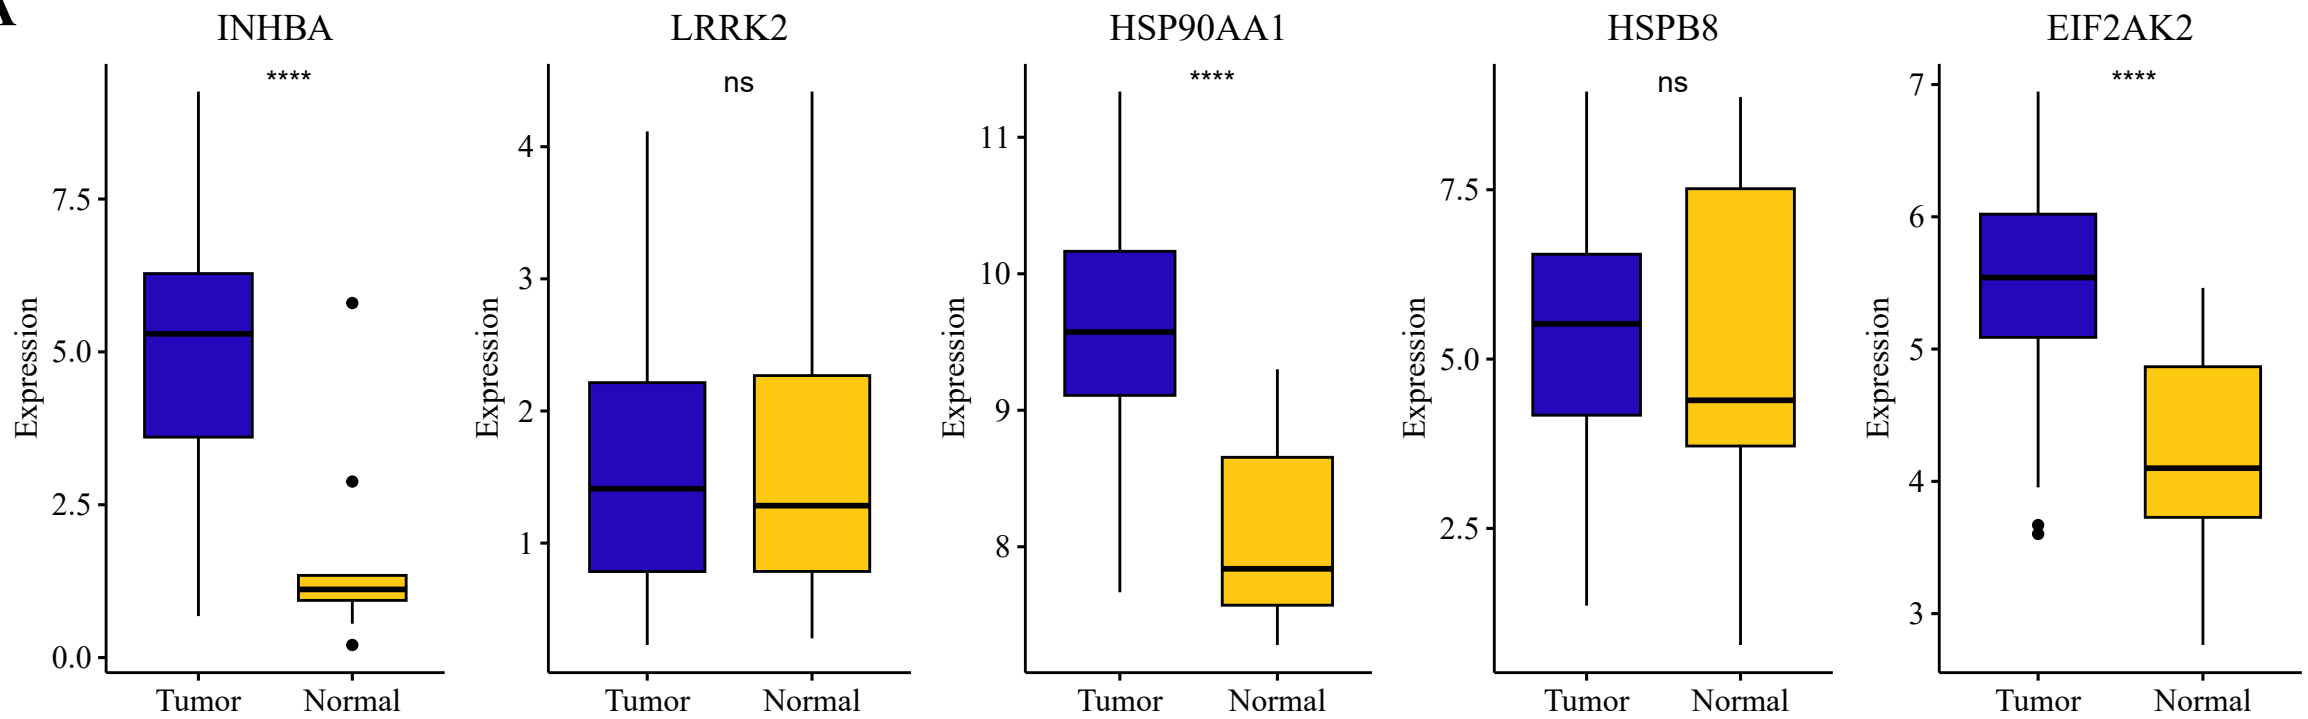**B**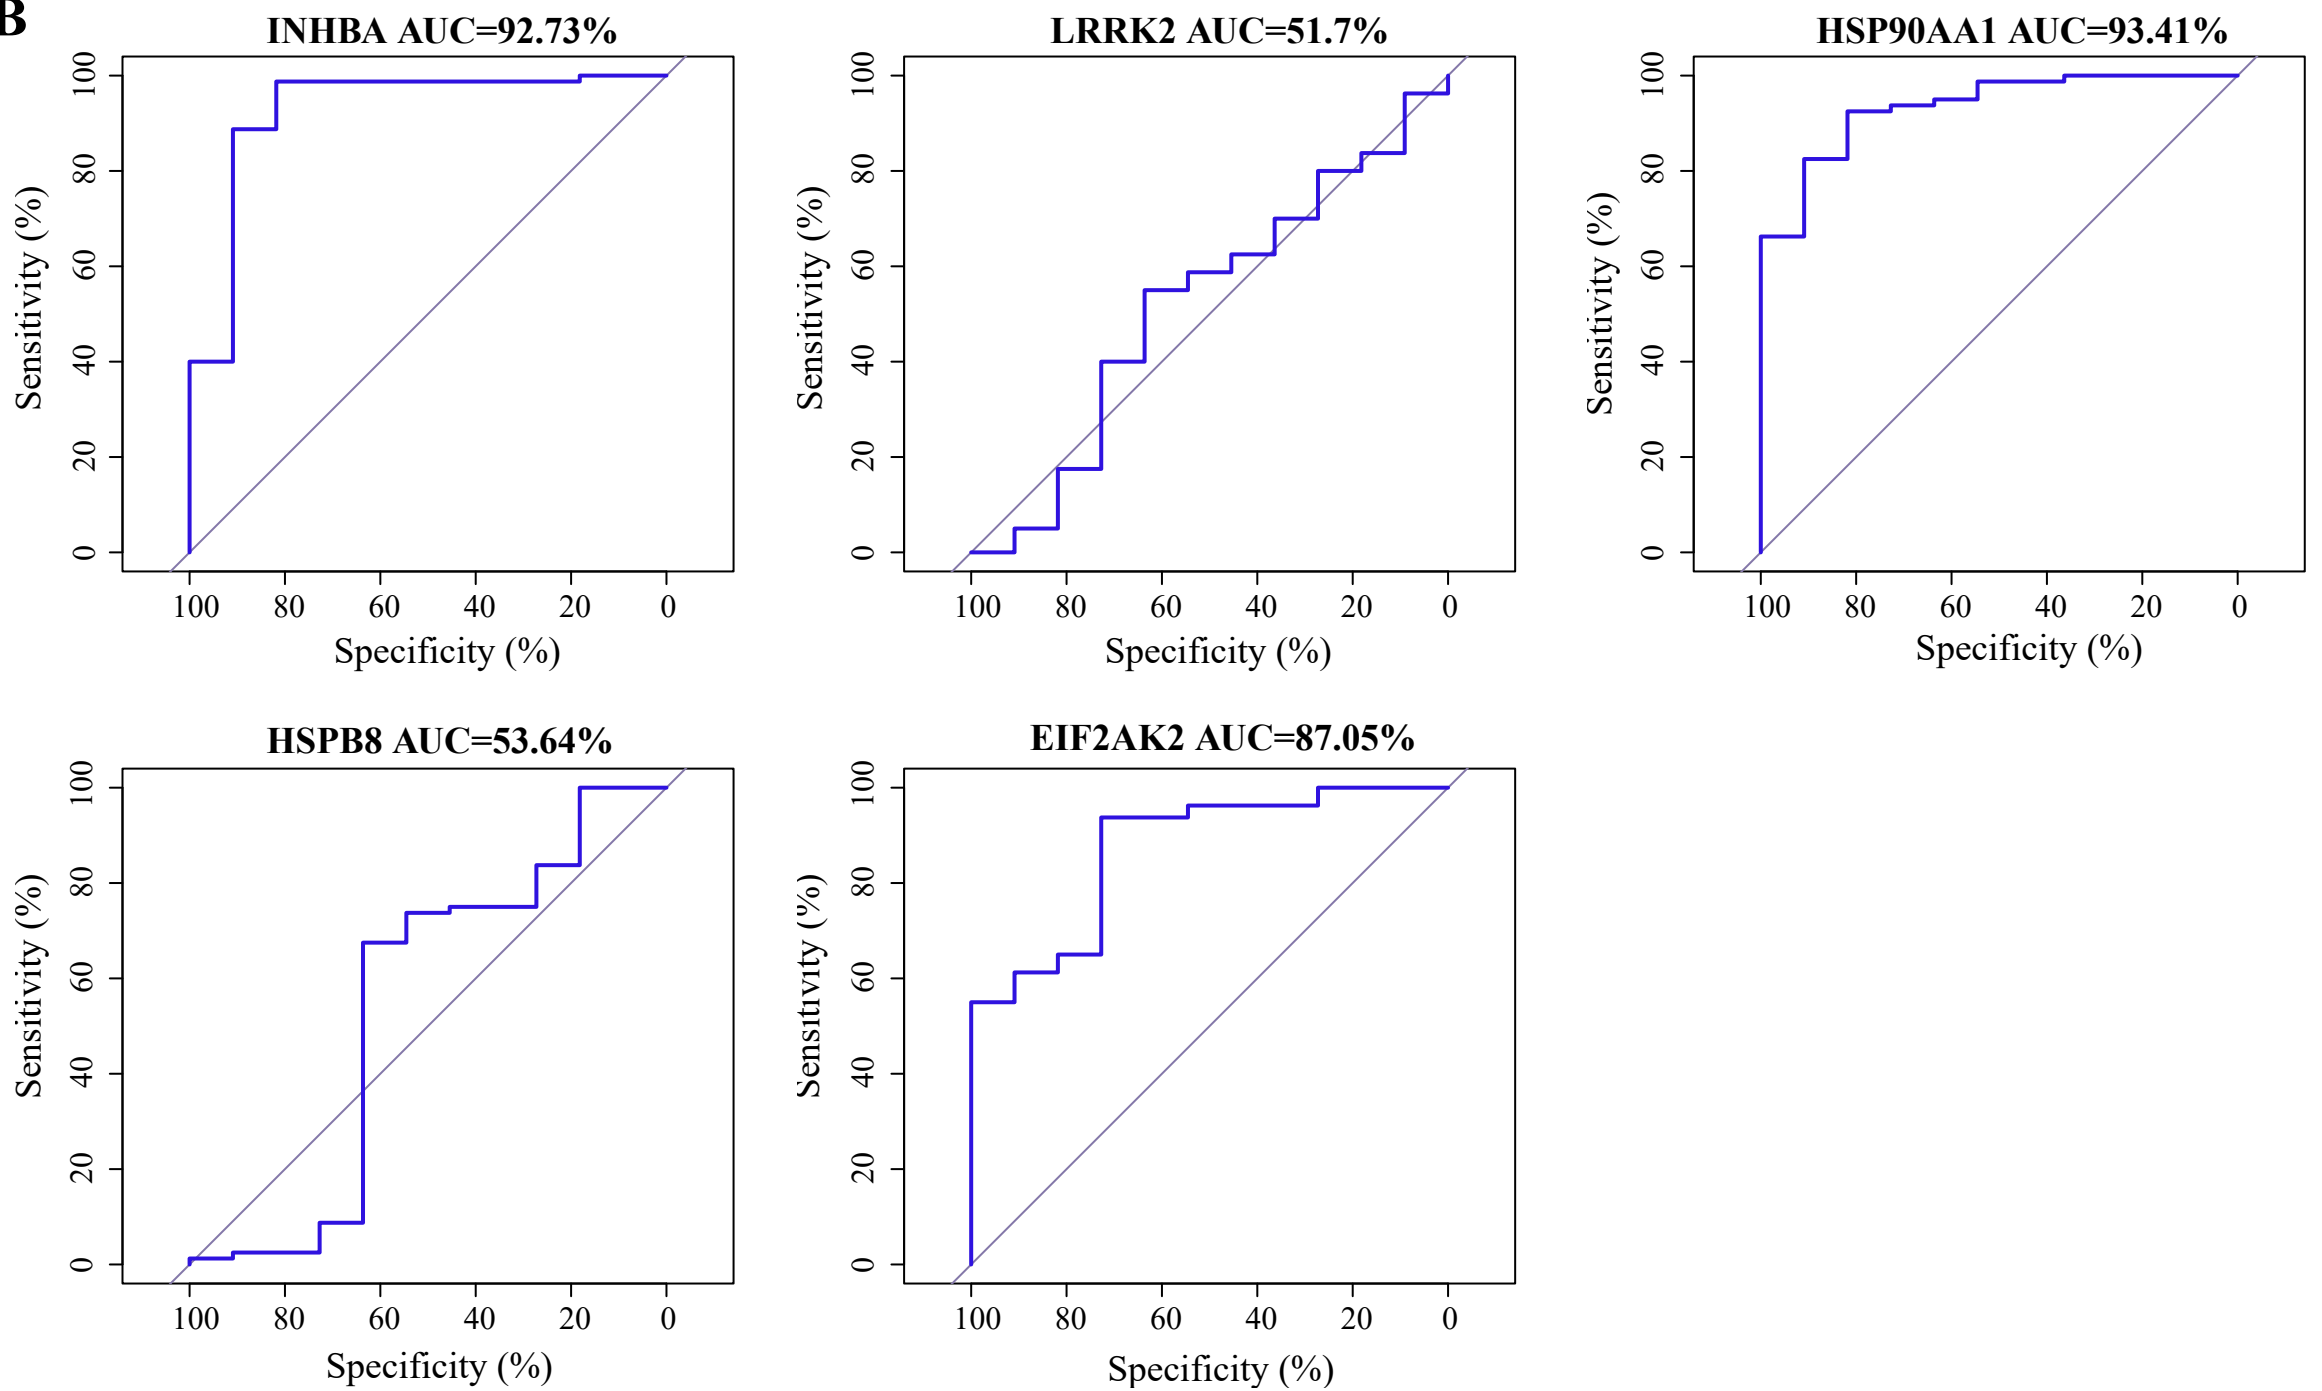

Supplement: Figure_S1.pdf [file Figure_S1.pdf]
