# Supplementary material for: Molecular insights into programmed cell death in esophageal squamous cell carcinoma
Source: PeerJ journal article supplement (doi:10.7717/peerj.17690), 2024-07-10

**INHBA** High Expr Low Expr

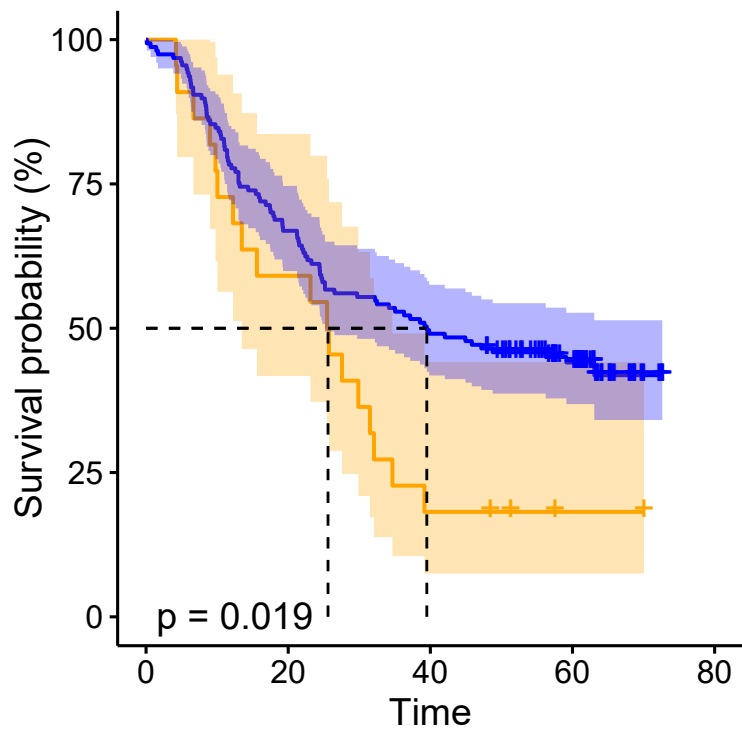

**LRRK2** High Expr Low Expr

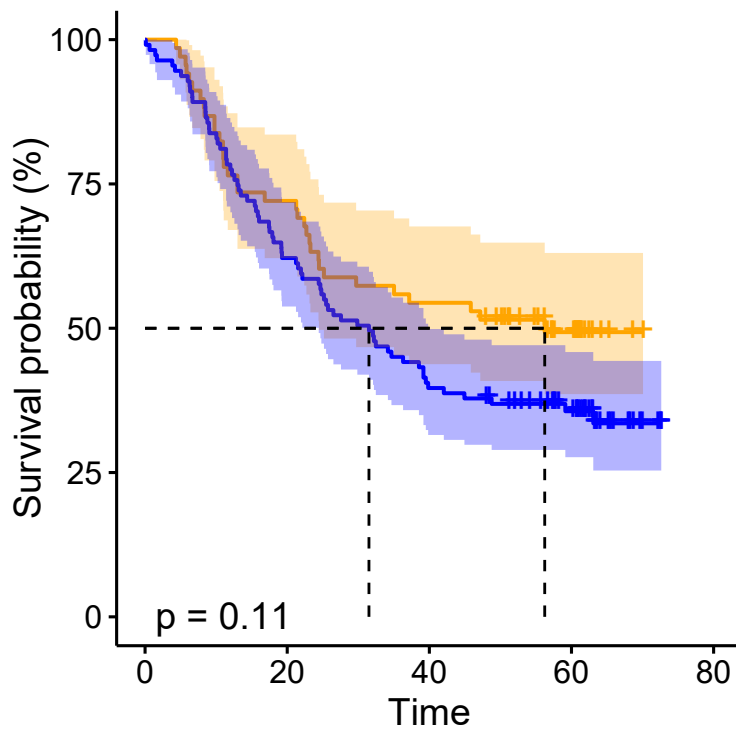

**HSP90AA1** High Expr Low Expr

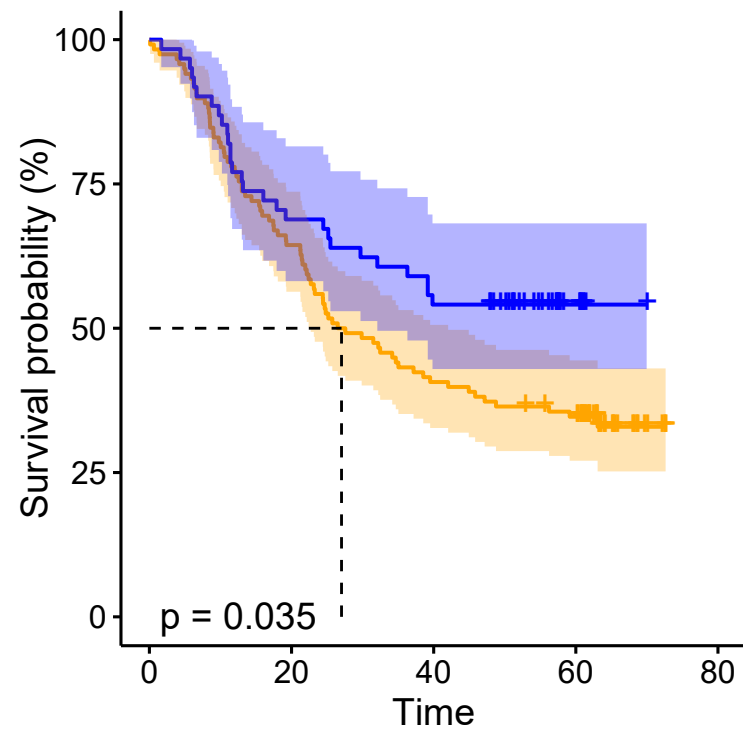

**HSPB8** High Expr Low Expr

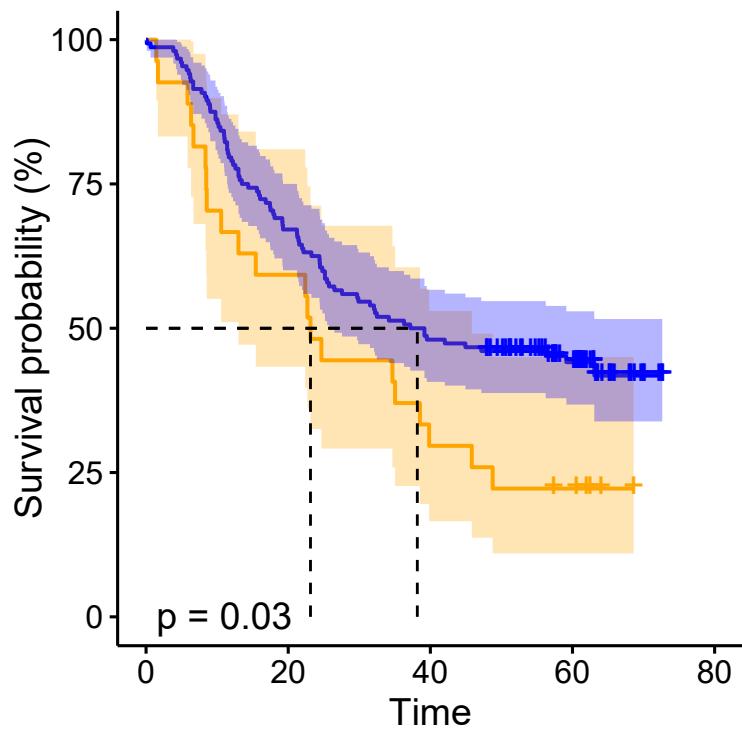

**EIF2AK2** High Expr Low Expr

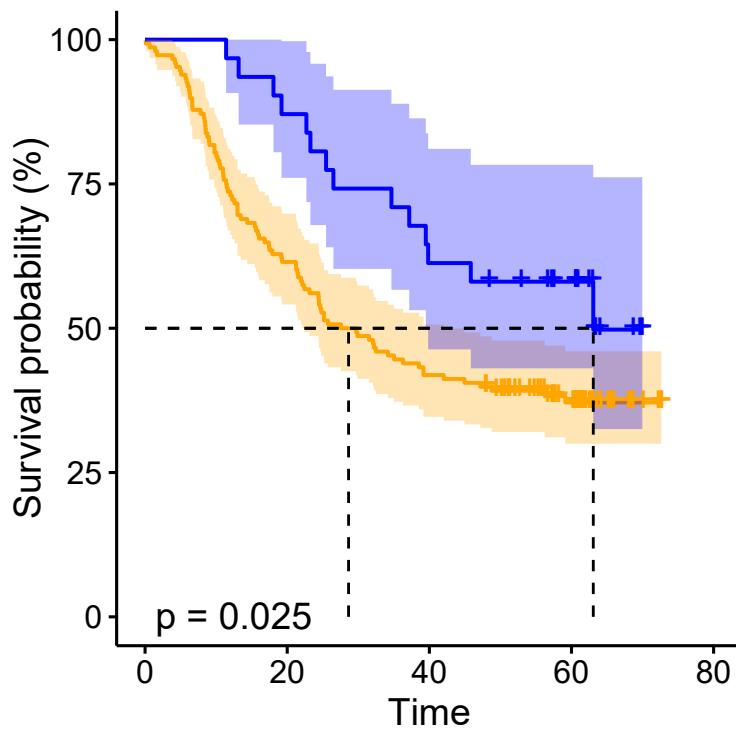

Supplement: Figure_S2.pdf [file Figure_S2.pdf]
