# Supplementary material for: Molecular insights into programmed cell death in esophageal squamous cell carcinoma
Source: PeerJ. 2024 Jul 10;12:e17690. doi: 10.7717/peerj.17690 (PMC11246021; doi:10.7717/peerj.17690)
Supplement: Supplemental Information 4 [file peerj-12-17690-s004.xlsx]

## Sheet: Sheet1
	Apoptosis	Pyroptosis	Ferroptosis	Autophagy	Necroptosis	Cuproptosis	Parthanatos	Entotic cell death	Netotic cell death	Lysosome-dependent cell death	Alkaliptosis	Oxeiptosis
1	AATF	BAK1	ABCC1	ABL1	GLUD1	FDX1	PARP	AMPK	ELANE	ABCA2	IKBKB	PGAM5
2	ABL1	BAX	ACACA	ABL2	GLUD2	LIAS	MIF	ATG5	MMP1	ABCB9	NFKB1	KEAP1
3	ACAA2	CASP1	ACO1	ACER2	ALOX15	LIPT1	AIFM1	ATG7	MPO	ACP2	CA9	AIFM1
4	ACKR3	CASP3	ACSF2	ADRA1A	FTH1	DLD	HSP70	BECN1	CAMP	ACP5	CHUK	NRF2
5	ACVR1	CASP4	ACSL1	ADRB2	PYG	DLAT	PAAN	CDC42	PADI4	ADGRE2	IKBKG	AIRE
6	ACVR1B	CASP5	ACSL3	AKT1	CAPN1	PDHA1	ARH3	CDH1	EIPA	AGA	NFKB1A
7	ADORA1	CASP6	ACSL4	AMBRA1	CASP1	PDHB	RNF146	CTNNA1	NCX1	AP1B1	RELA
8	AEN	CASP8	ACSL5	ATF6	GLNA	MTF1	ADPRHL2	CYBB	MIA	AP1G1
9	AGT	CASP9	ACSL6	ATG101	BAX	GLS	OGG1	MYH14	AP1M1
10	AGTR2	CHMP2A	AIFM2	ATG13	BCL2	CDKN2A	PI3KC3	AP1M2
11	AIFM1	CHMP2B	AKR1C1	ATG14	FADD	GCSH	RHOA	AP1S1
12	AKT1	CHMP3	AKR1C2	ATG2A	RIPK1	ATP7A	RNF146	AP1S2
13	ANXA6	CHMP4A	AKR1C3	ATG2B	TNF	ATP7B	ROCK	AP1S3
14	APAF1	CHMP4B	ALOX12	ATG5	TNFRSF1A	SLC31A1	RUBCN	AP3B1
15	APPL1	CHMP4C	ALOX15	ATG7	TRADD	UVRAG	AP3B2
16	AR	CHMP6	ALOX5	ATM	TRAF2	AP3D1
17	ARHGEF2	CHMP7	ATG5	ATP13A2	PPIA	AP3M1
18	ARL6IP5	CYCS	ATG7	ATP6V0A1	CAPN2	AP3M2
19	ARMC10	ELANE	ATP5MC3	ATP6V0A2	HSP90A	AP3S1
20	ARRB2	GPX4	BACH1	ATP6V0B	IL1A	AP3S2
21	ASAH2	GSDMB	CARS	ATP6V0C	TNFSF6	AP4B1
22	ATF3	GSDMC	CBS	ATP6V0D1	TNFRSF6	AP4E1
23	ATF4	GSDMD	CD44	ATP6V0D2	CASP8	AP4M1
24	ATM	GSDME	CHAC1	ATP6V0E1	JNK	AP4S1
25	ATP2A1	GZMB	CISD1	ATP6V0E2	JAK2	ARF1
26	ATP2A3	HMGB1	CP	ATP6V1A	CAMK2	ARL8B
27	ATP5IF1	IL18	CRYAB	ATP6V1B1	IL1B	ARSA
28	AVP	IL1A	CS	ATP6V1B2	IFNG	ARSB
29	BAD	IL1B	CYBB	ATP6V1C1	STAT3	ARSG
30	BAG3	IRF1	DPP4	ATP6V1C2	IRF9	ASAH1
31	BAG5	IRF2	EMC2	ATP6V1D	TNFSF10	ATP10B
32	BAG6	NLRC4	FADS2	ATP6V1E1	TNFRSF10A	ATP13A2
33	BAK1	NLRP1	FANCD2	ATP6V1E2	TNFRSF10B	ATP6AP1
34	BAX	NLRP2	FDFT1	ATP6V1G1	CFLAR	ATP6V0A1
35	BBC3	NLRP3	FTH1	ATP6V1G2	XIAP	ATP6V0A2
36	BCAP31	NLRP6	FTL	ATP6V1H	BID	ATP6V0A4
37	BCL10	NLRP7	FTMT	AUP1	AIFM1	ATP6V0B
38	BCL2	NOD1	G6PD	BAD	TRPM7	ATP6V0C
39	BCL2A1	PLCG1	GCLC	BAG3	IFNAR1	ATP6V0D1
40	BCL2L1	PJVK	GCLM	BCL2	IFNAR2	ATP6V0D2
41	BCL2L10	PRKACA	GLS2	BCL2L11	IFNGR1	ATP6V1H
42	BCL2L11	PYCARD	GOT1	BECN1	IFNGR2	BLK
43	BCL2L12	SCAF11	GPX4	BMF	TLR3	BLOC1S1
44	BCL2L14	TINAP	GSS	BNIP3	TIRP	BLOC1S2
45	BCL2L2	TNF	HMGCR	BNIP3L	IFNA	BORCS5
46	BCL3	TP53	HMOX1	BOK	IFNB	BORCS6
47	BCLAF1	TP63	HSBP1	C9orf72	TRIF	BTK
48	BDKRB2	AIM2	HSPB1	CALCOCO2	VDAC1	C12orf4
49	BDNF	GSDMA	IREB2	CAMKK2	SLC25A4S	CBL
50	BECN1	IL6	KEAP1	CAPN1	PPID	CD164
51	BID	NOD2	LPCAT3	CAPNS1	CYLD	CD300A
52	BIK	TIRAP	MAP1LC3A	CASP1	RIPK3	CD63
53	BIRC6	MAP1LC3B	CASP3	MLKL	CD68
54	BLOC1S2	MAP1LC3C	CDC37	TRAF5	CD84
55	BMF	MT1G	CDK5	TLR4	CHGA
56	BMP4	NCOA4	CDK5R1	RBCK1	CLN3
57	BMP5	NFE2L2	CHMP4A	HMGB1	CLN5
58	BMPR1B	NFS1	CHMP4B	JAK1	CLNK
59	BNIP3	NOX1	CISD2	JAK3	CLTA
60	BNIP3L	NQO1	CLEC16A	TYK2	CLTB
61	BOK	NRF2	CLN3	STAT1	CLTC
62	BRCA1	OTUB1	CLU	STAT2	CLTCL1
63	BRCA2	PCBP1	CPTP	STAT4	CLU
64	BRSK2	PCBP2	CSNK2A2	STAT5A	CPLX2
65	BTK	PEBP1	CTSA	STAT5B	CTNS
66	CAAP1	PGD	CTTN	STAT6	CTSA
67	CASP1	PHKG2	DAP	H2A	CTSB
68	CASP10	PRNP	DAPK1	TNFAIP3	CTSC
69	CASP12	PROM2	DAPK2	RNF31	CTSD
70	CASP2	PTGS2	DAPK3	CHMP2A	CTSE
71	CASP3	RPL8	DAPL1	CHMP2B	CTSF
72	CASP4	SAT1	DCN	VPS24	CTSG
73	CASP5	SAT2	DDIT3	CHMP4A	CTSH
74	CASP8	SLC11A2	DDRGK1	CHMP4B	CTSK
75	CASP8AP2	SLC1A5	DEPDC5	CHMP6	CTSL
76	CASP9	SLC39A14	DEPP1	VPS4	CTSO
77	CAV1	SLC39A8	DHRSX	CHMP1	CTSS
78	CCAR2	SLC3A2	DNM1L	CHMP5	CTSV
79	CCK	SLC40A1	DRAM1	SMPD1	CTSW
80	CD14	SLC7A11	DRAM2	PYCARD	CTSZ
81	CD24	SQLE	EEF1A1	NLRP3	DEF8
82	CD27	STEAP3	EEF1A2	ZBP1	DNASE2
83	CD28	TF	EIF2AK4	IL33	DNASE2B
84	CD38	TFRC	EIF4G1	FTL	ENTPD4
85	CD3E	TP53	EIF4G2	SQSTM1	FAM98A
86	CD44	VDAC2	ELAPOR1	VDAC2	FER
87	CD5	VDAC3	EP300	VDAC3	FES
88	CD70	ZEB1	EPM2A	CHMP7	FGR
89	CD74	ERCC4	PGAM5	FLCN
90	CDIP1	ERN1	BIRC2	FOXF1
91	CDKN1A	EXOC1	BIRC3	FTH1
92	CDKN2D	EXOC4	EIF2AK2	FTL
93	CEBPB	EXOC7	PLA2G4	FUCA1
94	CFLAR	EXOC8	DNM1L	GAA
95	CHAC1	FBXL2	SPATA2	GAB2
96	CHCHD10	FBXO7	FAF1	GALC
97	CHEK2	FBXW7	SHARPIN	GALNS
98	CIB1	FEZ1	NOX2	GATA2
99	CIDEB	FEZ2	USP21	GBA
100	CLU	FLCN	PARP1	GCC2
101	COA8	FOXK1	CHMP4C	GGA1
102	COL2A1	FOXK2	GGA2
103	CRADD	FOXO1	GGA3
104	CREB3	FOXO3	GLA
105	CREB3L1	FTH1	GLB1
106	CRH	FTL	GM2A
107	CRIP1	FYCO1	GNPTAB
108	CSF2	FZD5	GNPTG
109	CSNK2A1	GAPDH	GNS
110	CSNK2A2	GATA4	GUSB
111	CTH	GBA	HDAC6
112	CTNNA1	GFAP	HEXA
113	CTSC	GNAI3	HEXB
114	CTTN	GOLGA2	HGS
115	CUL1	GPR137	HGSNAT
116	CUL2	GPR137B	HMOX1
117	CUL3	GPSM1	HPS6
118	CUL4A	GSK3A	HSPA8
119	CUL5	GSK3B	HYAL1
120	CX3CL1	HAX1	IDS
121	CX3CR1	HDAC6	IDUA
122	CXCL12	HERC1	IGF2R
123	CYLD	HGF	IL13
124	CYP1B1	HIF1A	IL13RA2
125	DAB2IP	HMGB1	IL4
126	DAP	HMOX1	IL4R
127	DAP3	HSP90AA1	KIF1B
128	DAPK1	HSPA8	KIT
129	DAPK2	HSPB1	KXD1
130	DAPK3	HSPB8	LAMP1
131	DAPL1	HTR2B	LAMP2
132	DAXX	HTRA2	LAMP3
133	DBH	HTT	LAMTOR1
134	DCC	HUWE1	LAPTM4A
135	DDIAS	IFI16	LAPTM4B
136	DDIT3	IFNG	LAPTM5
137	DDIT4	IKBKG	LAT
138	DDX3X	IL10	LAT2
139	DDX47	IL10RA	LGALS9
140	DDX5	IL4	LGMN
141	DEDD	IRGM	LIPA
142	DEDD2	ITPR1	LRRK2
143	DELE1	KAT5	LYN
144	DEPTOR	KAT8	M6PR
145	DIABLO	KDM4A	MAN2B1
146	DIDO1	KDR	MANBA
147	DNAJA1	KEAP1	MAP1LC3A
148	DNAJC10	KIF25	MAP6
149	DNM1L	KLHL22	MCOLN1
150	DPF2	KLHL3	MFSD8
151	DYRK2	LACRT	MILR1
152	E2F1	LAMP1	MRGPRX2
153	E2F2	LAMP2	MT3
154	EDA2R	LAMP3	MYH9
155	EIF2AK3	LAMTOR1	NAGA
156	ELL3	LAMTOR2	NAGLU
157	ENO1	LAMTOR3	NAGPA
158	EP300	LAMTOR4	NAPSA
159	EPHA2	LAMTOR5	NCOA4
160	EPO	LARP1	NDEL1
161	ERBB3	LEP	NEDD4
162	ERCC6	LEPR	NEU1
163	ERN1	LGALS8	NPC1
164	ERN2	LRRK2	NPC2
165	ERO1A	LRSAM1	NR4A3
166	ERP29	LZTS1	PDPK1
167	EYA1	MAP1LC3A	PIK3C3
168	EYA2	MAP1LC3B	PIK3CD
169	EYA3	MAP1LC3C	PIK3CG
170	EYA4	MAP3K7	PIP4K2A
171	FADD	MAPK15	PIP4K2B
172	FAF1	MAPK3	PIP4P1
173	FAIM	MAPK8	PLA2G15
174	FAIM2	MAPT	PLA2G3
175	FAM162A	MCL1	PLEKHM1
176	FAS	MEFV	PLEKHM2
177	FASLG	MET	PPT1
178	FASTK	MFN2	PPT2
179	FBH1	MFSD8	PSAP
180	FBXW7	MID2	PSAPL1
181	FEM1B	MIR199A1	PTGDR
182	FGA	MIRLET7B	PTGDS
183	FGB	MLST8	RAB34
184	FGF10	MT3	RAB3A
185	FGFR1	MTCL1	RAB7A
186	FGFR3	MTDH	RAC2
187	FGG	MTM1	RUBCNL
188	FHIT	MTMR3	S100A13
189	FIGNL1	MTMR4	SCARB2
190	FIS1	MTMR8	SGSH
191	FNIP2	MTMR9	SLC11A1
192	FXN	MTOR	SLC11A2
193	FYN	NCOA4	SLC17A5
194	FZD9	NEDD4	SMPD1
195	G0S2	NLRP6	SNAP23
196	GABARAP	NOD1	SNAPIN
197	GATA1	NOD2	SNX16
198	GATA4	NPC1	SNX4
199	GCLM	NPRL2	SORL1
200	GDNF	NRBP2	SORT1
201	GFRAL	NUPR1	SPAG9
202	GGCT	OPTN	SPHK2
203	GHITM	ORMDL3	SQSTM1
204	GNAI2	OSBPL7	STXBP1
205	GNAI3	PAFAH1B2	STXBP2
206	GPER1	PARK7	SUMF1
207	GPX1	PHB2	SYK
208	GRINA	PHF23	SYTL4
209	GSDME	PIK3C2A	TCIRG1
210	GSK3A	PIK3C3	TFEB
211	GSK3B	PIK3CA	TMEM106B
212	GSKIP	PIK3CB	TPP1
213	GSTP1	PIK3R2	UNC13D
214	GZMB	PIM2	VAMP7
215	HDAC1	PINK1	VAMP8
216	HERPUD1	PIP4K2A	VPS33A
217	HGF	PIP4K2B	VPS33B
218	HIC1	PIP4K2C	VPS4A
219	HIF1A	PJVK	WASH3P
220	HINT1	PLEKHF1	ZFYVE16
221	HIP1	PLK2
222	HIP1R	PLK3
223	HIPK1	POLDIP2
224	HIPK2	PRKAA1
225	HMGB2	PRKAA2
226	HMOX1	PRKAB1
227	HNRNPK	PRKAB2
228	HRAS	PRKACA
229	HRK	PRKAG1
230	HSPA1A	PRKAG2
231	HSPA1B	PRKAG3
232	HSPB1	PRKD1
233	HTRA2	PRKN
234	HTT	PSAP
235	HYAL2	PTPN22
236	HYOU1	PYCARD
237	ICAM1	QSOX1
238	IFI16	RAB39B
239	IFI27	RAB3GAP1
240	IFI27L1	RAB3GAP2
241	IFI27L2	RAB7A
242	IFI6	RAB8A
243	IFNB1	RALB
244	IFNG	RASIP1
245	IGF1	RB1CC1
246	IKBKE	RETREG1
247	IL12A	RETREG3
248	IL19	RHEB
249	IL1A	RIPK2
250	IL1B	RMC1
251	IL2	RNF152
252	IL20RA	RNF41
253	IL33	RNF5
254	IL4	ROCK1
255	IL6R	RPTOR
256	IL7	RRAGA
257	INCA1	RRAGB
258	ING2	RRAGC
259	ING5	RRAGD
260	INHBA	RUBCN
261	INHBB	RUFY4
262	INS	SCFD1
263	ITGA6	SCOC
264	ITGAM	SEC22B
265	ITGAV	SESN1
266	ITM2C	SESN2
267	ITPR1	SESN3
268	ITPRIP	SH3BP4
269	IVNS1ABP	SH3GLB1
270	JAK2	SIRT1
271	JMY	SIRT2
272	JUN	SLC38A9
273	KDM1A	SMCR8
274	KITLG	SMG1
275	KRT18	SNCA
276	KRT8	SNRNP70
277	LCK	SNX32
278	LGALS12	SNX5
279	LGALS3	SNX6
280	LRRK2	SOGA1
281	LTBR	SOGA3
282	LY96	SPTLC1
283	MADD	SPTLC2
284	MAEL	SQSTM1
285	MAGEA3	SREBF1
286	MAP2K5	SREBF2
287	MAP3K5	STAT3
288	MAPK7	STBD1
289	MAPK8	STING1
290	MAPK8IP1	STK11
291	MAPK8IP2	STUB1
292	MAPK9	SUPT5H
293	MARCHF7	SVIP
294	MAZ	SYNPO2
295	MCL1	TAB2
296	MDM2	TAB3
297	MELK	TBC1D14
298	MFF	TBC1D25
299	MIF	TBK1
300	MIR132	TEX264
301	MIR15A	TFEB
302	MIR16-1	TICAM1
303	MIR17	TIGAR
304	MIR198	TLK2
305	MIR21	TMEM150A
306	MIR210	TMEM150B
307	MIR221	TMEM150C
308	MIR222	TMEM39A
309	MIR26B	TMEM39B
310	MIR27B	TMEM59
311	MIR449A	TOMM7
312	MKNK2	TP53
313	MLH1	TP53INP1
314	MLLT11	TP53INP2
315	MMP9	TPCN1
316	MNT	TPCN2
317	MOAP1	TREM2
318	MPV17L	TRIB3
319	MSH2	TRIM13
320	MSH6	TRIM14
321	MSX1	TRIM21
322	MUC1	TRIM22
323	MUL1	TRIM27
324	MYBBP1A	TRIM34
325	NACC2	TRIM38
326	NANOS3	TRIM5
327	NBN	TRIM6
328	NCK1	TRIM65
329	NCK2	TRIM68
330	NDUFA13	TRIM8
331	NDUFS3	TRIML1
332	NFATC4	TRIML2
333	NFE2L2	TSC1
334	NGF	TSC2
335	NGFR	TSPO
336	NKX3-1	UBA5
337	NLE1	UBQLN1
338	NME5	UBQLN2
339	NMT1	UBQLN4
340	NOC2L	UCHL1
341	NOG	UFC1
342	NOL3	UFL1
343	NONO	UFM1
344	NOS3	ULK1
345	NOX1	USP10
346	NR4A2	USP13
347	NUPR1	USP30
348	OPA1	USP33
349	P2RX4	USP36
350	P2RX7	UVRAG
351	P4HB	VDAC1
352	PAK2	VPS13C
353	PAK5	VPS13D
354	PARK7	VPS26A
355	PARP1	VPS26B
356	PARP2	VPS35
357	PAWR	WAC
358	PCGF2	WASHC1
359	PDCD10	WDFY3
360	PDCD5	WDR24
361	PDCD6	WDR41
362	PDIA3	WDR6
363	PDK1	WDR81
364	PDK2	WIPI2
365	PDPK1	ZC3H12A
366	PDX1	ZKSCAN3
367	PEA15	ZMPSTE24
368	PELI3
369	PERP
370	PF4
371	PHIP
372	PHLDA3
373	PIAS4
374	PIDD1
375	PIH1D1
376	PIK3R1
377	PINK1
378	PLAGL2
379	PLAUR
380	PLEKHF1
381	PLSCR3
382	PMAIP1
383	PML
384	POLB
385	POU4F1
386	POU4F2
387	PPARD
388	PPIA
389	PPIF
390	PPM1F
391	PPP1CA
392	PPP1R13B
393	PPP1R15A
394	PPP2R1B
395	PPP3CC
396	PPP3R1
397	PRDX2
398	PRELID1
399	PRKCA
400	PRKCD
401	PRKDC
402	PRKN
403	PRKRA
404	PRODH
405	PSEN1
406	PSMD10
407	PSME3
408	PTEN
409	PTGIS
410	PTH
411	PTPMT1
412	PTPN1
413	PTPN2
414	PTPRC
415	PTTG1IP
416	PYCARD
417	QARS1
418	RACK1
419	RAF1
420	RB1
421	RB1CC1
422	RBCK1
423	RELA
424	RET
425	RFFL
426	RHOT1
427	RHOT2
428	RIPK1
429	RIPK3
430	RNF183
431	RNF186
432	RNF34
433	RNF41
434	RPL11
435	RPL26
436	RPS27L
437	RPS3
438	RPS6KB1
439	RPS7
440	RRP8
441	RTKN2
442	RTL10
443	S100A8
444	S100A9
445	SCG2
446	SCN2A
447	SCRT2
448	SELENOK
449	SELENOS
450	SENP1
451	SEPTIN4
452	SERINC3
453	SERPINE1
454	SFN
455	SFPQ
456	SFRP1
457	SFRP2
458	SGMS1
459	SGPL1
460	SGPP1
461	SH3RF1
462	SHH
463	SHISA5
464	SIAH1
465	SIAH2
466	SIRT1
467	SIVA1
468	SKIL
469	SLC25A5
470	SLC35F6
471	SLC9A3R1
472	SMAD3
473	SNAI1
474	SNAI2
475	SNW1
476	SOD1
477	SOD2
478	SORT1
479	SP100
480	SRC
481	SRPX
482	SST
483	SSTR3
484	ST20
485	STK11
486	STK24
487	STK25
488	STK3
489	STK4
490	STRADB
491	STX4
492	STYXL1
493	SYVN1
494	TAF9
495	TAF9B
496	TCF7L2
497	TERT
498	TFDP1
499	TFDP2
500	TFPT
501	TGFB1
502	TGFB2
503	TGFBR1
504	THBS1
505	TICAM1
506	TICAM2
507	TIMM50
508	TIMP3
509	TLR3
510	TLR4
511	TM2D1
512	TMBIM1
513	TMBIM6
514	TMC8
515	TMEM102
516	TMEM109
517	TMEM117
518	TMEM14A
519	TMEM161A
520	TNF
521	TNFAIP3
522	TNFRSF10A
523	TNFRSF10B
524	TNFRSF10C
525	TNFRSF12A
526	TNFRSF1A
527	TNFRSF1B
528	TNFRSF25
529	TNFSF10
530	TNFSF12
531	TOPORS
532	TP53
533	TP53BP2
534	TP63
535	TP73
536	TPD52L1
537	TPT1
538	TRADD
539	TRAF1
540	TRAF2
541	TRAF7
542	TRAP1
543	TRIAP1
544	TRIB3
545	TRIM32
546	TRIM39
547	TXNDC12
548	TYROBP
549	UACA
550	UBB
551	UBE2K
552	UBE4B
553	UBQLN1
554	UMOD
555	UNC5B
556	URI1
557	USP28
558	USP47
559	VDAC2
560	VNN1
561	WDR35
562	WNT4
563	WWOX
564	XBP1
565	YAP1
566	YBX3
567	YWHAB
568	YWHAE
569	YWHAG
570	YWHAH
571	YWHAQ
572	YWHAZ
573	ZC3HC1
574	ZDHHC3
575	ZMYND11
576	ZNF205
577	ZNF385A
578	ZNF385B
579	ZNF622
580	ZSWIM2
